# Supplementary material for: LeukmiR: a database for miRNAs and their targets in acute lymphoblastic leukemia
Source: Database (Oxford). 2020 Mar 4;2020:baz151. doi: 10.1093/database/baz151 (PMC7054207; doi:10.1093/database/baz151)
Supplement: Supplementary_Table1_baz151 [file supplementary_table1_baz151.xlsx]

## Sheet: Table 1
Table 1. Novel microRNAs and their putative targets at energy level -15(∆Gkcal/mol) in different signaling pathways in Acute Lymphoblastic Leukemia(ALL).
miRNAs	Notch	NF-kB	Apop	p53	ERBB	TGFb	VEGF	Wnt
hsa-let-7b-3p	−	ATM	ATM	ATM	−	−	−	−
hsa-miR-1244	CTBP2, HDAC2, RBPJ, RFNG	ATM, CFLAR, CSNK2A2, IL1R1, PARP1	ATM, CFLAR, IL1R1, PIK3R1, PRKACB	ATM, IGF1, SESN3, THBS1, ZMAT3	BRAF, CRKL, EGFR, MAPK8, PIK3R1, PTK2, SOS2, SRC	PPP2R1B, SKP1, SMAD3, SMURF2, TGFB2, THBS1, ZFYVE16	MAPK14, NFAT5, PIK3R1, PTK2, SRC	APC, CSNK2A2, CTBP2, FZD6, LRP6, MAPK8, NFAT5, PPP2R1B, PRICKLE1, PRKACB, SKP1, SMAD3, TBL1XR1, TCF7L2, VANGL1
hsa-miR-1255a	−	PRKCB	TNFRSF10B	TNFRSF10B	PRKCB	BMPR1B	PRKCB	CHD8, PPP2R5E, PRKCB, WNT5A
hsa-miR-1273a	CREBBP, DTX2, DTX3L, HDAC2, NCSTN, PSEN1, PSENEN, RBPJ	ATM, BCL10, CFLAR, CSNK2B, IRAK4, LYN, PLCG2, TAB3, XIAP	AKT2, APAF1, ATM, BAX, BID, CAPN1, CASP8, CASP9, CFLAR, DFFB, IRAK2, IRAK4, PIK3CD, PRKAR2A, TP53, XIAP	APAF1, ATM, ATR, BAX, BID, CASP8, CASP9, DDB2, MDM2, MDM4, RRM2, THBS1, TP53	AKT2, CAMK2A, CBL, EREG, MAP2K2, MAP2K4, MAPK1, MAPK9, NCK1, NRG3, PAK4, PIK3CD, PLCG2, PRKCA, RPS6KB1, RPS6KB2	ACVR1, ACVR2A, ACVR2B, BMPR1A, CHRD, CREBBP, MAPK1, PPP2R1A, RBL2, RHOA, ROCK1, RPS6KB1, RPS6KB2, SKP1, SMAD2, SMAD4, SMURF1, SP1, THBS1, ZFYVE16	AKT2, CASP9, CDC42, JMJD7-PLA2G4B, MAP2K2, MAPK1, MAPK13, NFAT5, PIK3CD, PLA2G4B, PLA2G4E, PLCG2, PRKCA	CAMK2A, CREBBP, CSNK1A1, CSNK2B, FZD3, FZD4, MAPK9, NFAT5, PPP2R1A, PRKCA, PSEN1, RHOA, ROCK1, RUVBL1, SENP2, SKP1, SMAD2, SMAD4, TP53, WNT2B, WNT9B
hsa-miR-1285-5p	NUMB, NUMBL, PSEN1	CFLAR, CSNK2B, MAP3K14	CFLAR, MAP3K14, PIK3CG, PRKAR2A	GTSE1	ABL2, ERBB2, MAPK1, PIK3CG, RAF1	BMPR2, MAPK1, PPP2R1A, SMAD2, SMURF2, TGFB1	MAPK1, PIK3CG, RAF1	CSNK2B, PLCB2, PPP2R1A, PSEN1, SMAD2, TBL1XR1, TCF7
hsa-miR-1304-3p	DVL2, NCOR2	ATM, TAB3	ATM, CAPN1, TP53	ATM, TP53	CRK, NRAS	RBL1, SMAD2	NFATC4, NRAS	CACYBP, DVL2, NFATC4, SMAD2, TP53, WNT2B
hsa-miR-1304-5p	DTX3L	CSNK2A2, IKBKB, PLCG1, TRAF5, TRIM25	APAF1, BID, EXOG, IKBKB	APAF1, BID, CDK4, DDB2, MDM4	CBLB, PLCG1	BMPR1A, SKP1, SMAD2, ZFYVE9	NOS3, PLCG1	CSNK2A2, FZD3, PPP2R5B, PPP2R5C, SKP1, SMAD2, TCF7L1, WNT2B
hsa-miR-135a-3p	CREBBP	−	−	−	−	CREBBP	PLA2G6	CREBBP
hsa-miR-146a-3p	MAML1	CSNK2A1, ERC1, IRAK1, TRAF1, TRAF3	IL3RA, IRAK1	CDK6, RRM2B	−	PITX2	−	CSNK2A1, FZD4, LRP6, TBL1XR1
hsa-miR-148a-5p	−	−	−	−	−	ZFYVE16	−	PPP2R5E, TBL1XR1
hsa-miR-149-5p	−	DDX58, IKBKB, IRAK1, NFKB2	IKBKB, IRAK1, IRAK3	SIAH1	BRAF, ERBB2, JUN, MAPK9	LTBP1	MAPKAPK2, NOS3, VEGFA	AXIN2, JUN, MAPK9, SIAH1
hsa-miR-187-3p	−	BCL2	BCL2, IL1RAP	−	−	−	NFATC2	NFATC2
hsa-miR-187-5p	−	−	−	−	MAPK1, PTK2	MAPK1	MAPK1, PTK2	−
hsa-miR-190b	−	−	−	CDK6	CRKL, ERBB4	ZFYVE9	−	−
hsa-miR-19b-2-5p	DTX4	XIAP	IRAK3, PIK3CG, PIK3R1, PIK3R2, PPP3CA, PPP3CB, XIAP	−	PIK3CG, PIK3R1, PIK3R2	RBX1, SMURF2, THBS4	PIK3CG, PIK3R2, PLA2G4E, PPP3CA, PPP3CB	NLK, PPP3CA, PPP3CB, RBX1
hsa-miR-212-5p	EP300, NOTCH1	BCL2L1, ICAM1	BCL2L1, CASP8	CASP8	SHC4	AMHR2, EP300, SMAD6	−	CSNK1A1, EP300, TCF7, TCF7L1
hsa-miR-23b-5p	MAML2	−	EXOG	−	ABL1, ERBB2, MTOR, NRG2, PAK1	ACVR2B	−	APC
hsa-miR-29a-5p	HDAC2	CARD11	−	IGF1, MDM2	ABL1, EGF, EGFR, ERBB3, MAPK9, PRKCA	CDKN2B	PRKCA	DAAM2, MAPK9, PRKCA, RUVBL1, SENP2
hsa-miR-29b-2-5p	−	CXCL12, TICAM1	−	−	NRG1, SRC	−	SRC, VEGFA	APC, DAAM2
hsa-miR-302d-5p	PSEN1	−	−	−	−	−	VEGFA	PSEN1, TBL1X
hsa-miR-32-3p	−	−	PIK3CB	CCND2, GTSE1, THBS1	PIK3CB	INHBA, THBS1	PIK3CB	CCND2, DAAM1
hsa-miR-325	−	ZAP70	BID	BID, SHISA5	ARAF	ID1	PLA2G2C, PLA2G4E, VEGFA	APC, DAAM1, PPP2R5C
hsa-miR-329-5p	CREBBP, MAML2	IKBKB, TRIM25	AKT2, CASP8, CASP9, CHP2, IKBKB, IRAK3, PRKACB, TNFSF10	CASP8, CASP9, CDK1, CHEK1, IGF1, STEAP3, TP53I3	ABL1, AKT2, PAK4, PAK7, SOS2	CREBBP, IFNG, SKP1	AKT2, CASP9, CHP2, JMJD7-PLA2G4B, MAPK13	CHP2, CREBBP, CSNK1A1, CSNK1A1L, CTNNBIP1, NLK, PLCB4, PRKACB, SKP1, VANGL1, WNT2B
hsa-miR-367-3p	−	ATM, IKBKB	ATM, IKBKB	ATM, MDM2	BRAF	PPP2CB, ROCK2	−	PPP2CB, ROCK2, WNT2B
hsa-miR-370-3p	MAML2, PSEN1	TNFRSF11A	CASP3	CASP3	EGFR, PAK6, PTK2, SOS1	PPP2R1A, SMAD7, TGFB1	JMJD7-PLA2G4B, PTK2, VEGFA	CSNK1E, NKD1, PLCB2, PPP2R1A, PSEN1
hsa-miR-376a-5p	−	TRAF3	PIK3CD	−	KRAS, PIK3CD	−	KRAS, PIK3CD	−
hsa-miR-376b-5p	−	−	−	−	RPS6KB1, SHC4	ACVR1C, RPS6KB1	−	−
hsa-miR-376c-5p	MAML3	−	BAD, PPP3R1	−	BAD	ACVR1C, GDF7	BAD, PPP3R1	PPP3R1
hsa-miR-382-5p	−	BLNK	−	−	CBL	−	−	FZD2, PPP2R5A, TBL1X
hsa-miR-449b-3p	−	−	−	−	MAPK1	ACVR2B, MAPK1, SP1	MAPK1, MAPKAPK3	WNT5B
hsa-miR-500a-3p	−	TAB2	−	−	ABL1	−	−	−
hsa-miR-505-5p	DVL1, DVL3, NOTCH4	CD40	BAX	BAX	CBLB, PRKCA	−	KDR, PLA2G2D, PRKCA	DVL1, DVL3, PRKCA, RUVBL1
hsa-miR-508-5p	CREBBP, DTX2, NOTCH3	−	−	CCND3, CDKN1A	CDKN1A	CREBBP, PPP2R1A, SMAD6	−	CCND3, CREBBP, PORCN, PPP2R1A
hsa-miR-518a-3p	DLL4, RBPJL	CARD11	PIK3R1, PRKAR1B	−	ERBB2, MAPK8, PIK3R1	−	PIK3R1	MAPK8
hsa-miR-518c-3p	KAT2B	CARD11, CSNK2A1	APAF1, FASLG	APAF1	−	RBL2, TGFBR2	VEGFA	CSNK2A1, PRICKLE2
hsa-miR-520g-3p	JAG2	ATM, CSNK2A1, LYN, ZAP70	APAF1, ATM, FASLG, PIK3R3	APAF1, ATM	ERBB4, PAK3, PIK3R3, RAF1	ROCK2, SMAD6, SP1, TGFB3	PIK3R3, PLA2G2A, PLA2G6, RAF1, VEGFA	CSNK2A1, DAAM1, DKK2, NKD1, ROCK2
hsa-miR-520g-5p	CREBBP, DLL1, NUMB	BIRC3, UBE2I	BIRC3, PRKACA	MDM4, PTEN, SIAH1	ABL1, EREG, GRB2, PAK3	CREBBP	RAC2	CREBBP, PRKACA, RAC2, SIAH1
hsa-miR-555	−	TRAF6	−	−	CBLB	−	−	−
hsa-miR-566	CREBBP, DTX3L	IRAK4	IRAK3, IRAK4	MDM2, MDM4	MAP2K2, RPS6KB1	BMPR1A, CREBBP, RPS6KB1, SMAD2, ZFYVE16	MAP2K2, MAPK12	CREBBP, SMAD2
hsa-miR-567	−	ERC1, LTBR, TNFAIP3	−	−	PRKCA	−	PRKCA	PRICKLE1, PRKCA, SENP2
hsa-miR-576-3p	HDAC2	BCL2A1, TLR4	PIK3CG	CDK6	NRG4, PIK3CG	PPP2CB, ROCK1	PIK3CG	FZD6, PPP2CB, ROCK1
hsa-miR-584-3p	DLL4	BCL2, CCL4, CCL4L1, CCL4L2	BCL2	ATR, BBC3	MAPK3, PAK4	GDF5, MAPK3, PITX2	MAPK3	−
hsa-miR-589-3p	−	ATM, TNFSF13B	ATM	ATM, CCND3, RFWD2	CBL	SMAD4	−	CCND3, SMAD4
hsa-miR-608	MAML1, MAML2, NOTCH2	BTK, CSNK2A2, ERC1, ICAM1, IRAK1, LAT, LTBR, MYD88, TAB1, TRAF2	AKT2, CAPN1, IL1RAP, IRAK1, MYD88, PIK3R5, PRKACB, TNFRSF10C, TRAF2	BBC3, CCND1	ABL1, AKT2, CAMK2D, EIF4EBP1, ERBB2, JUN, PIK3R5, PRKCA, PTK2	ACVR1, FST, RBL1, SMAD3, SMAD9, SMURF1, TGFB1	AKT2, PIK3R5, PLA2G4E, PRKCA, PTK2	AXIN1, CAMK2D, CCND1, CSNK2A2, JUN, LRP6, PRKACB, PRKCA, SMAD3
hsa-miR-612	DLL4, DTX2, DVL1, DVL3, JAG1, KAT2A, KAT2B, MAML1, MAML3, NCOR2, NOTCH1, NOTCH4, NUMBL	CARD11, CFLAR, GADD45B, LTBR, PIDD1, PLCG1, RELA, UBE2I	AKT1, CASP10, CASP3, CFLAR, DFFA, RELA, TNFRSF10C	BAI1, CASP3, CDKN2A, GADD45B, MDM2, SIAH1, THBS1, TP53AIP1, TP73, TSC2	AKT1, ARAF, CAMK2A, CAMK2B, ERBB2, ERBB3, PAK1, PAK4, PLCG1, PRKCA, PTK2, SHC1, SRC, TGFA	ACVR1C, ACVRL1, BMP4, PPP2CB, SMAD6, SMURF1, TGFBR2, THBS1	AKT1, PLA2G6, PLCG1, PRKCA, PTK2, PXN, SPHK2, SRC	APC2, AXIN2, CAMK2A, CAMK2B, CSNK1E, DAAM2, DVL1, DVL3, FZD4, FZD8, PLCB3, PPP2CB, PPP2R5B, PPP2R5D, PRKCA, SIAH1, VANGL2, WNT3
hsa-miR-630	−	−	PIK3R1	CDK6	PAK1, PIK3R1	BMPR2	PIK3R1	−
hsa-miR-767-5p	−	−	−	CCND1, SERPINB5, SESN3	MTOR	−	−	CCND1
hsa-miR-769-3p	DLL1, NUMBL, RBPJL	LTBR, PLCG1	AKT1, AKT2	THBS1, TSC2	AKT1, AKT2, CAMK2G, MAPK3, PLCG1, PRKCA, SHC2	BMP4, LEFTY2, MAPK3, PPP2R1A, THBS1	AKT1, AKT2, MAPK3, NFATC1, NFATC4, PLCG1, PRKCA, SHC2	CAMK2G, CHD8, NFATC1, NFATC4, PPP2R1A, PPP2R5B, PPP2R5D, PRKCA, TCF7
hsa-miR-876-3p	NOTCH2	CSNK2A1, TAB3	BAX, CYCS, DFFA, TP53	BAX, CYCS, MDM2, TP53	GRB2	SMAD2	−	CSNK2A1, FZD3, FZD4, SMAD2, TP53
hsa-miR-885-3p	DVL2, NOTCH2, RBPJ	ATM, IKBKB, LAT, LTBR	ATM, IKBKB	ATM, CCNE1	BRAF, EGF, MAPK10, PRKCG	BMP7, FST	NFATC1, PLA2G10, PRKCG, SPHK2, VEGFA	DVL2, MAPK10, NFATC1, PRKCG, TCF7
hsa-miR-96-3p	−	LCK	PRKACB	CCND3	ABL1	−	−	CCND3, PRKACB
